# Supplementary material for: Visible-light-induced C–H alkylation of 2-amino-1,4-naphthoquinones
Source: Royal Society of Chemistry journal article supplement (doi:10.1039/d4ob00764f), 2024-01-01
Supplement: d4ob00764f2.pdf [file d4ob00764f2.pdf]

## Supporting information

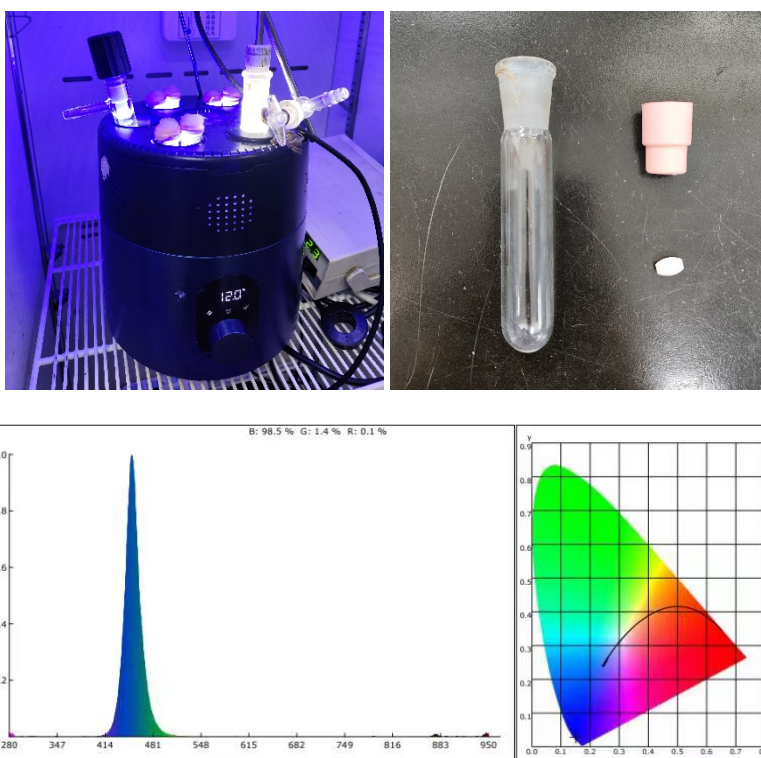

**Figure S1.** Photo-reactor and the spectrum of our lamp (blue LED)

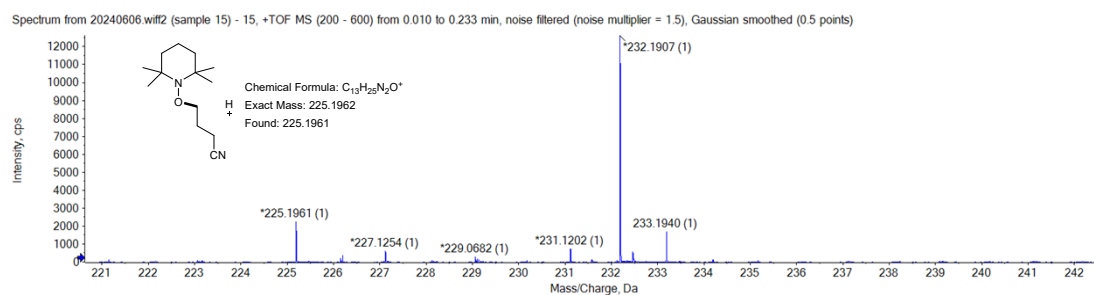

**Figure S2.** The HRMS spectrum of **4**

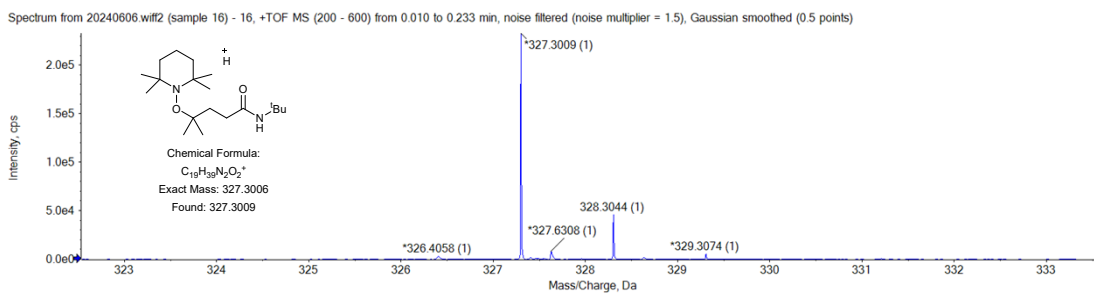

**Figure S3.** The HRMS spectrum of **8**

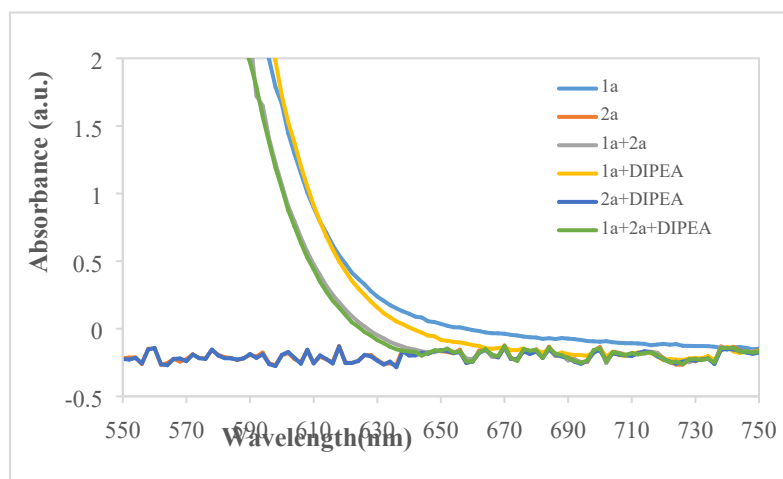

**Figure S4.** Absorption spectra.

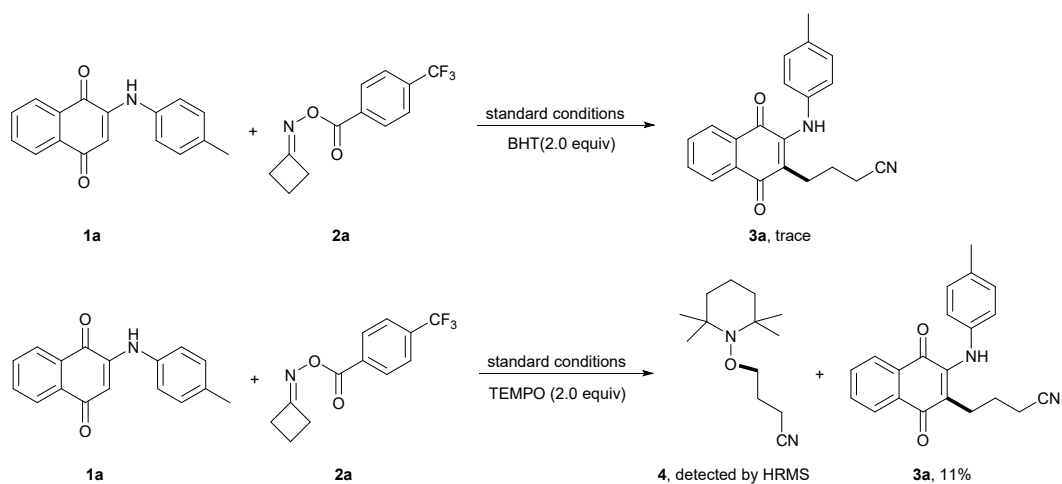

**Scheme S1** Control Experiments

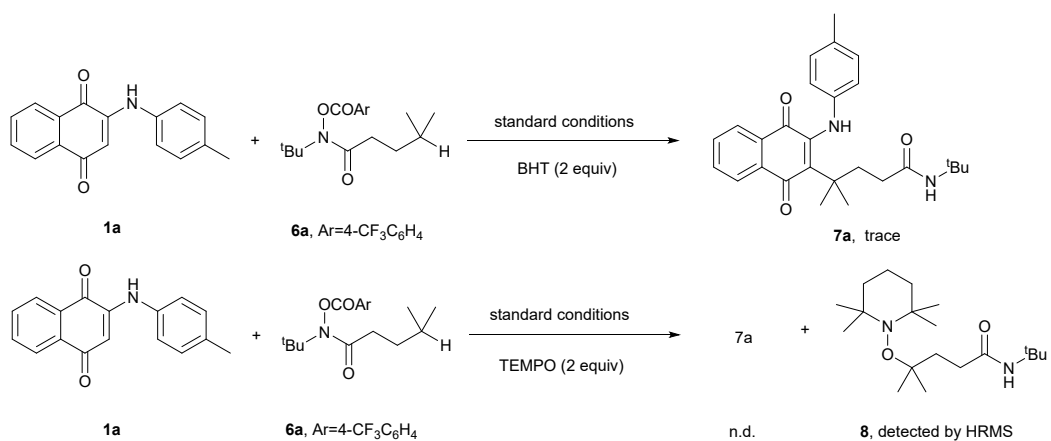

**Scheme S2** Control Experiments
